# Supplementary material for: Microbial Fertilization Improves Soil Health When Compared to Chemical Fumigation in Sweet Lily
Source: MDPI journal article supplement (doi:10.3390/jof8080847), 2022-08-12
Supplement: s1 [file s1]

Supplementary Materials

# Microbial Fertilization Improves Soil Health When Compared to Chemical Fumigation in Sweet Lily

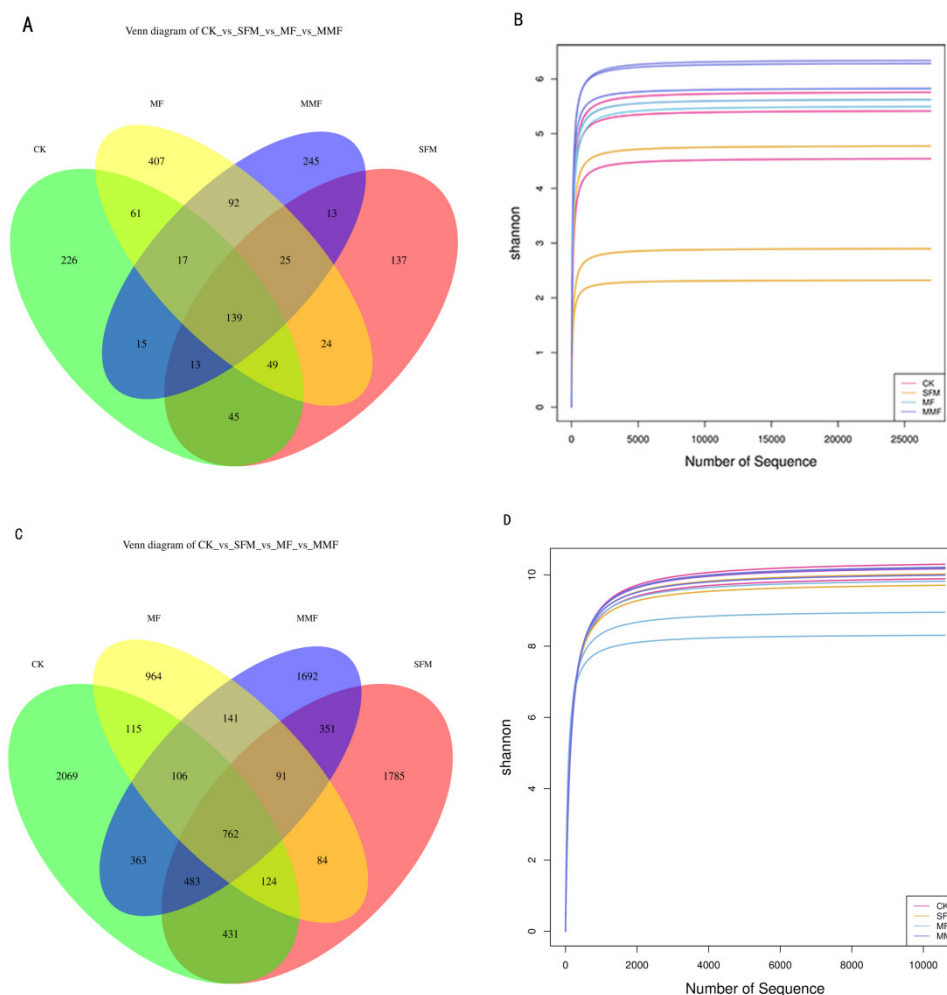

**Supplementary Figure S2.** Venn diagram of fungal OTUs (A) and Shannon-Wiener curves (B) and Venn diagram of bacterial OTUs (C) and Shannon-Wiener curves (D) of Lanzhou lily soil microorganism communities from Illumina NovaSeq data.

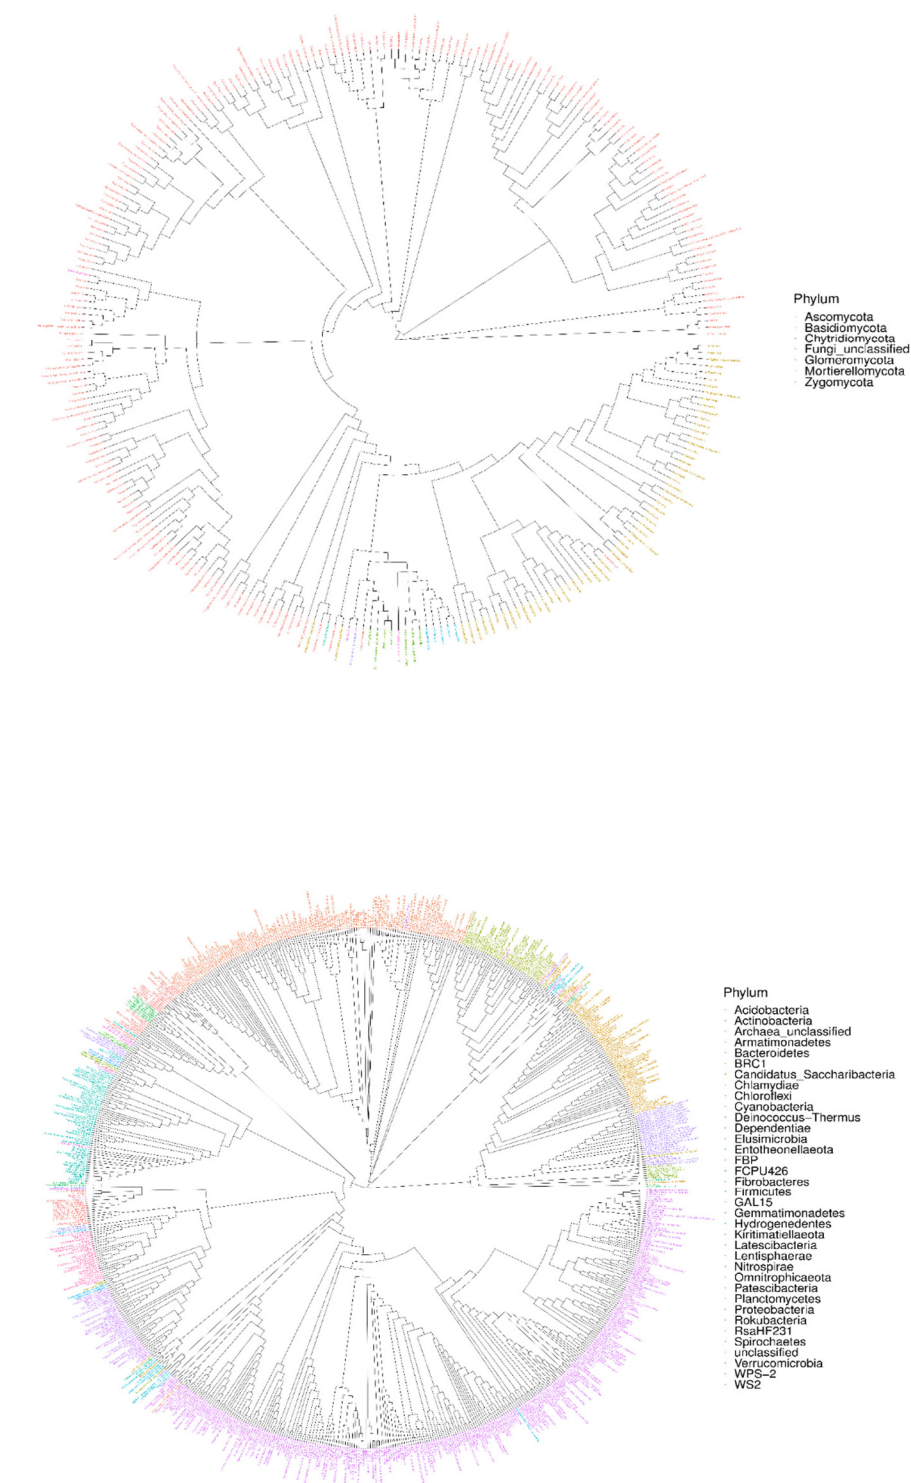

**Supplementary Figure S2.** The phylogeny tree of fungi (A) and bacteria (B) of Lanzhou lily rhizosphere soil among different treatments from Illumina NovaSeq.

**Supplementary Table S1.** *Sphingomonas* species and *Fusarium* species distribution of total reads of Lanzhou lily rhizosphere soil from Illumina NovaSeq data.

| Treatments                               | CK    | SFM   | MF    | MMF   |
|------------------------------------------|-------|-------|-------|-------|
| <i>(a) Sphingomonas</i> species          |       |       |       |       |
| <i>s__uncultured_Sphingomonas_sp.</i>    | 1.23% | 1.37% | 2.82% | 3.12% |
| <i>s__Sphingomonas_unclassified</i>      | 0.33% | 0.45% | 1.08% | 1.14% |
| <i>s__Sphingomonas_sediminicola</i>      | 0.08% | 0.17% | 0.35% | 0.21% |
| <i>s__Sphingomonas_sp._CB_286425</i>     | 0.03% | 0.05% | 0.03% | 0.05% |
| <i>s__Sphingomonas_lutea</i>             | 0.00% | 0.02% | 0.05% | 0.03% |
| <i>s__Sphingomonas_sp._CA25</i>          | 0.01% | 0.00% | 0.04% | 0.04% |
| <i>s__Sphingomonas_sp._CB_286428</i>     | 0.00% | 0.03% | 0.00% | 0.04% |
| <i>s__Sphingomonas_sp._CB_286429</i>     | 0.01% | 0.00% | 0.00% | 0.04% |
| <i>s__Sphingomonas_haloaromaticamans</i> | 0.00% | 0.00% | 0.00% | 0.01% |
| <i>(b) Fusarium</i> species              |       |       |       |       |
| <i>s__Fusarium_domesticum</i>            | 1.87% | 0.58% | 1.50% | 1.01% |
| <i>s__Fusarium_merismoides</i>           | 0.20% | 0.34% | 0.19% | 1.22% |
| <i>s__Fusarium_oxysporum_f_sp_psidii</i> | 0.00% | 0.24% | 0.00% | 0.08% |
| <i>s__Fusarium_solani</i>                | 0.03% | 0.03% | 0.10% | 0.05% |
| <i>s__Fusarium_lateritium</i>            | 0.07% | 0.00% | 0.00% | 0.11% |
| <i>s__Fusarium_redolens</i>              | 0.04% | 0.01% | 0.01% | 0.00% |
| <i>s__Fusarium_tricinctum</i>            | 0.01% | 0.03% | 0.00% | 0.01% |
| <i>s__Fusarium_lunatum</i>               | 0.00% | 0.00% | 0.00% | 0.03% |
| <i>s__Fusarium_cuneirostrum</i>          | 0.01% | 0.00% | 0.00% | 0.00% |

**Supplementary Table S2.** Summary of soil physicochemical properties of Lanzhou lily rhizosphere soil among different treatments: the data has published [16].

| Treatment | Bulk density<br>(g · cm <sup>-3</sup> ) | Moisture content<br>(%) | pH          | Salt content<br>(g · kg <sup>-1</sup> ) | Organic matter<br>(g · kg <sup>-1</sup> ) | Available nitrogen (mg · kg <sup>-1</sup> ) | Available phosphorus<br>(mg · kg <sup>-1</sup> ) | Available potassium<br>(mg · kg <sup>-1</sup> ) |
|-----------|-----------------------------------------|-------------------------|-------------|-----------------------------------------|-------------------------------------------|---------------------------------------------|--------------------------------------------------|-------------------------------------------------|
| CK        | 1.33±0.01a                              | 14.63±0.09a             | 7.76±0.03c  | 0.48±0.01d                              | 13.21±0.10d                               | 65.16±1.01c                                 | 94.48±0.93d                                      | 236.55±2.8a                                     |
| SFM       | 1.32±0.01ab                             | 14.20±0.21b             | 7.87±0.03b  | 0.58±0.01c                              | 13.95±0.13c                               | 71.29±0.86b                                 | 146.18±5.98c                                     | 219.71±3.54b                                    |
| MF        | 1.31±0.01b                              | 13.19±0.11c             | 7.90±0.03ab | 0.80±0.01b                              | 14.74±0.13b                               | 82.57±0.99a                                 | 194.33±2.59b                                     | 204.89±3.69c                                    |
| MMF       | 1.30±0.01b                              | 12.09±0.07d             | 7.99±0.03a  | 1.08±0.04a                              | 16.18±0.38a                               | 83.25±0.80a                                 | 209.95±3.35a                                     | 171.04±3.25d                                    |
